# Supplementary material
Source: PubMed Central journal article supplement (PMC3630999)
Supplement: NIHMS450796-supplement-1_si_001.pdf [file NIHMS450796-supplement-1_si_001.pdf]

# Supporting Information

## Synthesis and Antimalarial Efficacy of Two-Carbon Linked Artemisinin-Derived Trioxane Dimers in Combination with Known Antimalarial Drugs

Bryan T. Mott, Abhai Tripathi, Maxime A. Siegler, Cathy D. Moore, David J.  
Sullivan, and Gary H. Posner

### Supporting Information Table of Contents:

|                                                        |    |
|--------------------------------------------------------|----|
| Crystallographic data for dimer ketone <b>24</b>       | S2 |
| Tabular <sup>1</sup> H NMR data for selected compounds | S3 |
| 2D NOESY for ( <i>Z</i> )- <b>26</b>                   | S5 |
| 2D NOESY for ( <i>E</i> )- <b>26</b>                   | S7 |

Figure S1 – Crystal structure of dimer ketone **24**

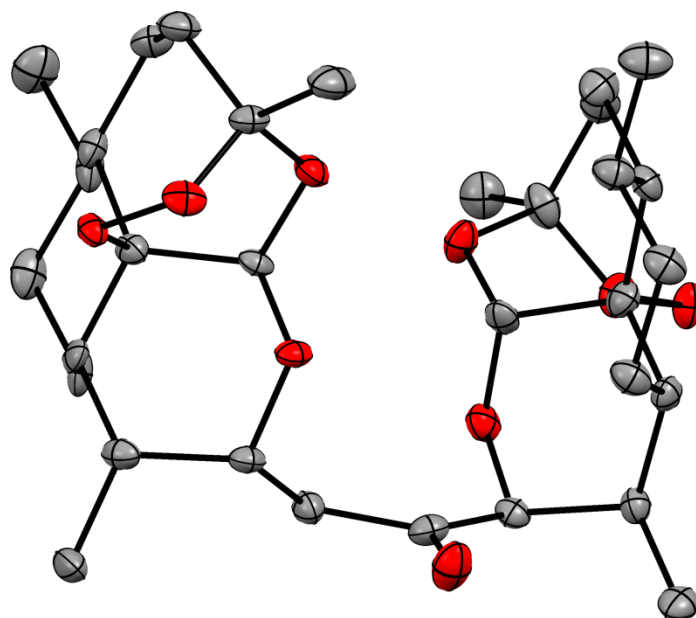

### **X-ray crystallography**

All reflection intensities were measured at 110(2) K using a KM4/Xcalibur (detector: Sapphire3) with enhance graphite-monochromated Mo  $K\alpha$  radiation ( $\lambda = 0.71073 \text{ \AA}$ ) under the program CrysAlisPro (Version 1.171.35.11 Oxford Diffraction Ltd., 2011). The program CrysAlisPro (Version 1.171.35.11, Oxford Diffraction Ltd., 2011) was used to refine the cell dimensions. Data reduction was done using the program CrysAlisPro (Version 1.171.35.11, Oxford Diffraction Ltd., 2011). The structure was solved with the program SHELXS-97 (Sheldrick, 2008) and was refined on  $F^2$  with SHELXL-97 (Sheldrick, 2008). Analytical numeric absorption corrections based on a multifaceted crystal model were applied using CrysAlisPro (Version 1.171.35.11, Oxford Diffraction Ltd., 2011). The temperature of the data collection was controlled using the system Cryojet (manufactured by Oxford Instruments). The H atoms (except when specified) were placed at calculated positions using the instructions AFIX 13, AFIX 23, or AFIX 137 with isotropic displacement parameters having values 1.2 or 1.5 times  $U_{eq}$  of the attached C atoms.

The structure is mostly ordered but the structure is built of channels along the  $c$  axis containing disordered solvent molecules; the contribution of the disordered species was then taken out using the program SQUEEZE for the final refinement. All details of the SQUEEZE refinement are

provided in the final CIF file. Because there were no significant anomalous scattering effects (data collection using Mo  $K\alpha$  radiation and no element heavier than Si), the Flack parameter is indeterminate. Friedel pairs were merged. The absolute structure was assigned based on the known chirality of the target compound.

**24**, Fw = 576.70,\* colorless lath,  $0.77 \times 0.15 \times 0.14 \text{ mm}^3$ , hexagonal,  $P6_5$  (no. 170),  $a = 37.8319(8)$ ,  $c = 11.1225(2) \text{ \AA}$ ,  $V = 13786(2) \text{ \AA}^3$ ,  $Z = 18$ ,  $D_x = 1.250 \text{ g cm}^{-3}$ ,\*  $\mu = 0.090 \text{ mm}^{-1}$ ,\* abs. corr. range: 0.984–0.990. 49637 Reflections were measured up to a resolution of  $(\sin \theta/\lambda)_{\text{max}} = 0.59 \text{ \AA}^{-1}$ . 8525 Reflections were unique ( $R_{\text{int}} = 0.0587$ ), of which 7406 were observed [ $I > 2\sigma(I)$ ]. 1126 Parameters were refined with 1 restraint.  $R1/wR2$  [ $I > 2\sigma(I)$ ]: 0.0679/0.1636.  $R1/wR2$  [all refl.]: 0.0762/0.1695.  $S = 1.077$ . Residual electron density found between  $-0.41$  and  $0.93 \text{ e \AA}^{-3}$ .

\* excluding the contribution of the unresolved residual electron density

Table S1 – Relevant  $^1\text{H}$  NMR chemical shifts and coupling constants for selected compounds:

| Cmpd Info | Structure | C5 $\delta$ | C5' $\delta$ | C10 $\delta$ | $J_{C10}$ | C10' $\delta$ | $J_{C10'}$ |
|-----------|-----------|-------------|--------------|--------------|-----------|---------------|------------|
| <b>20</b> |           | 5.47        | -            | 5.96         | 9.8 Hz    | -             | -          |
| <b>21</b> |           | 5.56        | -            | 4.73         | 5.7 Hz    | -             | -          |
| <b>22</b> |           | 5.65        | -            | 4.75         | 6.8 Hz    | -             | -          |

|                             |                                                                                     |      |      |      |        |      |                            |
|-----------------------------|-------------------------------------------------------------------------------------|------|------|------|--------|------|----------------------------|
| 24                          | 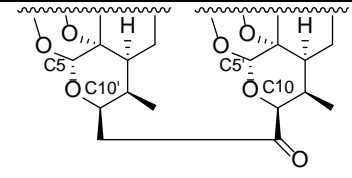   | 5.57 | 5.30 | 4.57 | 6.3 Hz | 4.84 | 9.5 Hz<br>6.2 Hz<br>3.8 Hz |
| Less polar –<br><b>Z-25</b> |    | 5.39 | 5.37 | 5.68 | 6.9 Hz | 4.53 | 9.1 Hz<br>5.9 Hz<br>3.3 Hz |
| More polar –<br><b>E-25</b> |    | 5.50 | 5.42 | 5.17 | 6.4 Hz | 4.60 | m                          |
| Less polar –<br><b>Z-26</b> |   | 5.41 | 5.35 | 5.56 | 6.9 Hz | 4.55 | 8.9 Hz<br>5.9 Hz<br>4.4 Hz |
| More polar –<br><b>E-26</b> |  | 5.62 | 5.35 | 5.09 | 6.4 Hz | 4.58 | buried                     |
| 27                          |  | 5.40 | 5.36 | 5.63 | 6.9 Hz | 4.56 | buried                     |

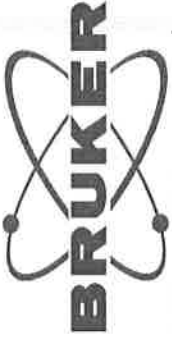

NAME BTM-methyloxime-1

EXPNO 2  
 PROCNO 1  
 Date\_ 201302-3  
 Time\_ 9.47  
 INSTRUM spect  
 PROBHD 5 mm PABBO BB-  
 PULPROG noesyph  
 TD 2048  
 CDC-3  
 NS -6  
 DS 4  
 SWH 4084.967 Hz  
 FIDRES 1.9946-3 Hz  
 AQ 0.2507252 sec  
 RG 256  
 DW 122.400 usec  
 DE 6.50 usec  
 TE 298.8 K  
 D0 0.00010674 sec  
 D1 1.00000000 sec  
 D8 0.30000001 sec  
 IN0 0.00024480 sec

==== CHANNEL f1 =====  
 NUC1 1H  
 P1 12.30 usec  
 PL1 -4.00 dB  
 PLLW 23.34542084 W  
 SFO1 400.1318419 MHz  
 ND0 1  
 TD 256  
 SFO1 400.1318 MHz  
 FIDRES 15.956903 Hz  
 SW 10.209 Ppm  
 FmODE States-TPPI  
 SI 1024  
 SF 400.1300000 MHz  
 WDW QSINE  
 SSB 2  
 LB 0.00 Hz  
 GB 0  
 PC 1.00  
 SI 1024  
 MC2 States-TPPI  
 SF 400.1300000 MHz  
 WDW QSINE  
 SSB 2  
 LB 0.00 Hz  
 GB 0

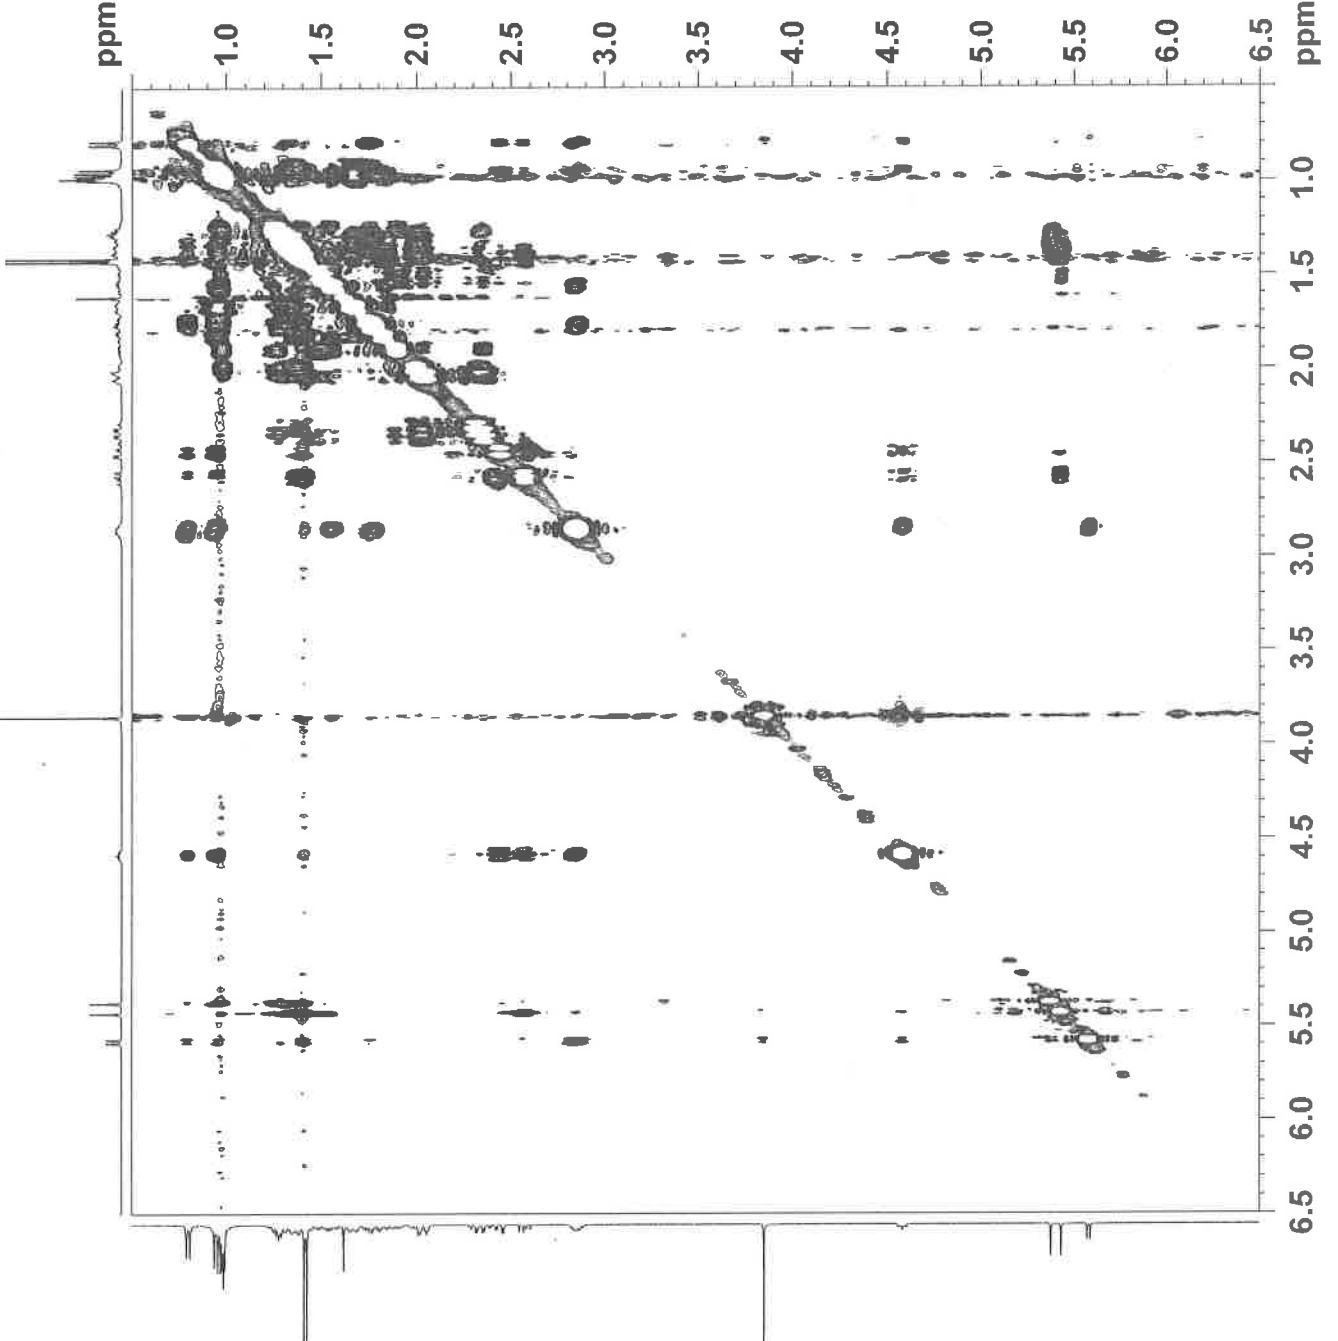

methyloxime Z-26

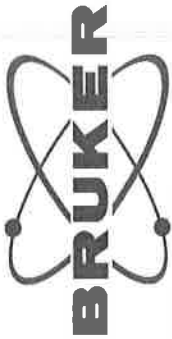

BTM-methyloxime-1

|         |                   |
|---------|-------------------|
| NAME    | BTM-methyloxime-1 |
| EXPNO   | 2                 |
| PROCNO  | 1                 |
| Date_   | 20130213          |
| Time_   | 9.47              |
| INSTRUM | spect             |
| PROBHD  | 5 mm PABBO BB-    |
| PULPROG | noesyph           |
| TD      | 2048              |
| SOLVENT | CDCl3             |
| NS      | 16                |
| DS      | 4                 |
| SWH     | 4084.967 Hz       |
| FIDRES  | 1.994613 Hz       |
| AQ      | 0.2507252 sec     |
| RG      | 256               |
| DW      | 122.400 usec      |
| DE      | 6.50 usec         |
| TE      | 298.8 K           |
| D0      | 0.00010674 sec    |
| D1      | 1.00000000 sec    |
| D8      | 0.30000001 sec    |
| INO     | 0.00024480 sec    |

==== CHANNEL f1 =====

|        |                 |
|--------|-----------------|
| NUC1   | 1H              |
| P1     | 12.30 usec      |
| PL1    | -4.30 dB        |
| PL1W   | 23.34542084 W   |
| SFO1   | 400.1318419 MHz |
| ND0    | 1               |
| TD     | 256             |
| SFO1   | 400.1318 MHz    |
| FIDRES | 15.956903 Hz    |
| SW     | 10.209 Ppm      |
| FnMODE | States-TPPI     |
| SI     | 1024            |
| SF     | 400.1300000 MHz |
| WDW    | QSINE           |
| SSB    | 2               |
| LB     | 0.00 Hz         |
| GB     | 0               |
| PC     | 1.00            |
| SI     | 1024            |
| MC2    | States-TPPI     |
| SF     | 400.1300000 MHz |
| WDW    | QSINE           |
| SSB    | 2               |
| LB     | 0.00 Hz         |
| GB     | 0               |

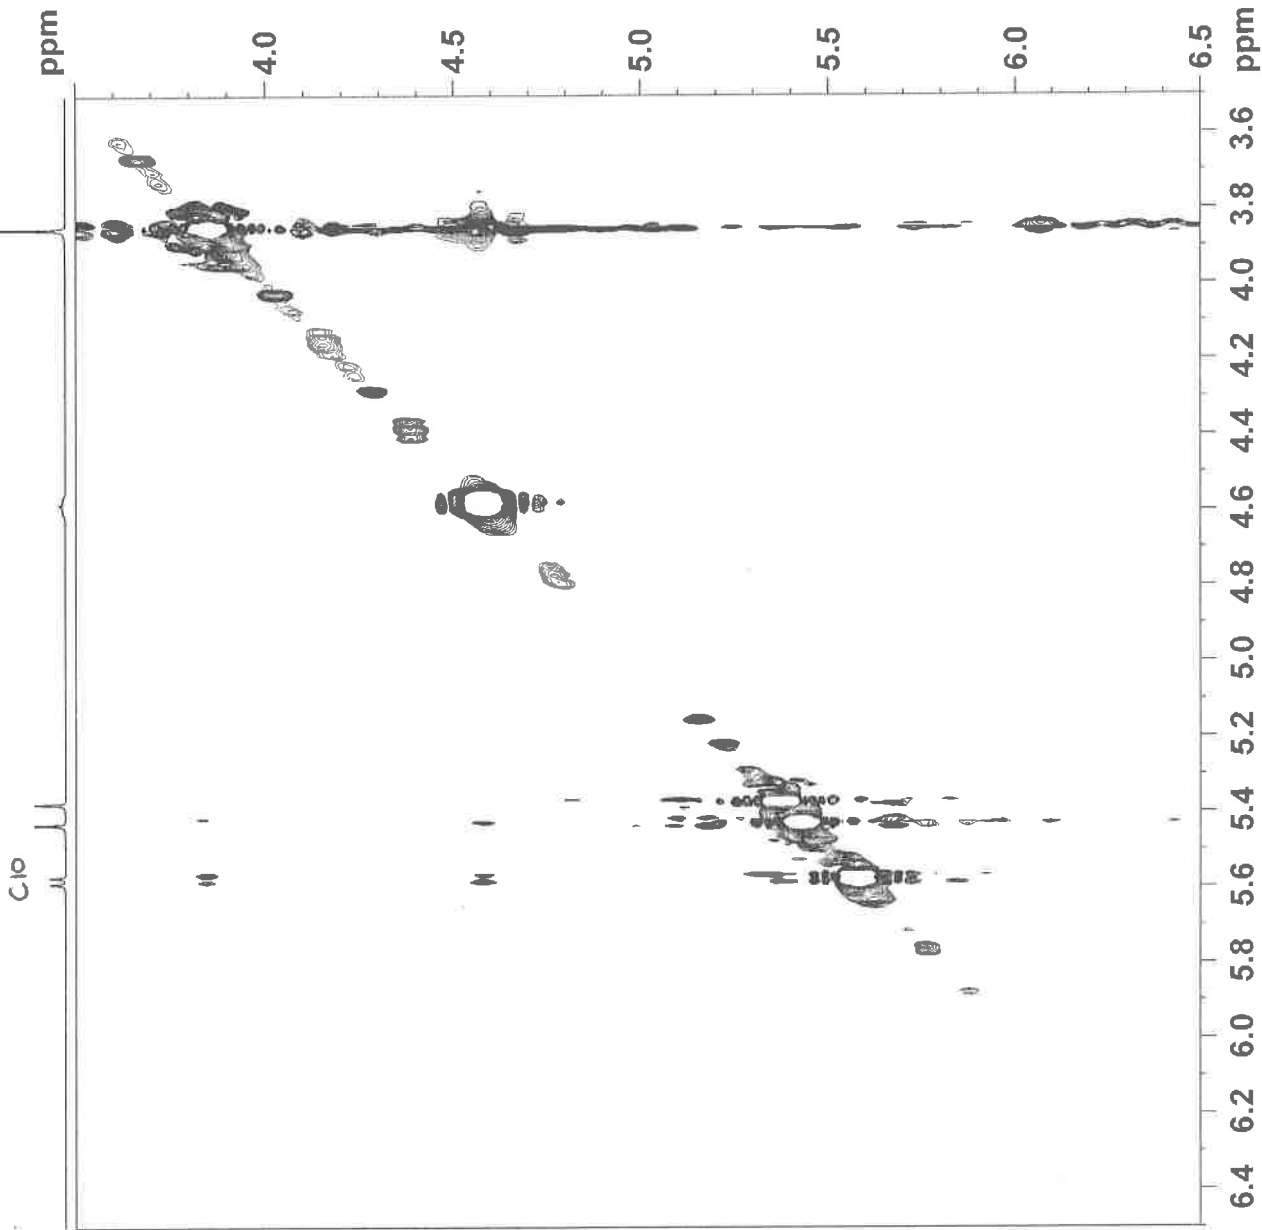

oxime  
methyl

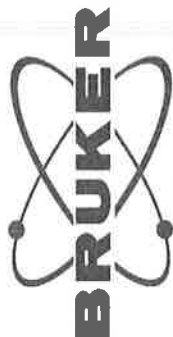

BTM-methyloxime-2

NAME  
EXPNO 1  
PROCNO 2  
Date\_ 20130213  
Time 7.43  
INSTRUM spect  
PROBHD 5 mm PABBO BB-  
PULPROG noesyph  
TD 2048  
SOLVENT CDCl3  
NS 16  
DS 4  
SWH 4084.967 Hz  
FIDRES 1.994613 Hz  
AQ 0.2507252 sec  
RG 256  
DW 122.400 usec  
DE 6.50 usec  
TE 298.8 K  
D0 0.00010674 sec  
D1 1.00000000 sec  
D8 0.30000001 sec  
INO 0.00024480 sec

==== CHANNEL f1 =====  
NUC1 -H  
P1 12.30 usec  
PL1 -4.00 dB  
PL1W 23.34542084 W  
SFO1 400.1318419 MHz  
ND0 1  
TD 256  
SFO1 400.1318 MHz  
FIDRES 15.956903 Hz  
SW 10.209 ppm  
FAMODE States-TP2I  
SI 1024  
SF 400.1300090 MHz  
WDW QSI  
SSB 2  
LB 0.00 Hz  
GB 0  
PC 1.00  
SI 1024  
MC2 States-TP2I  
SF 400.1300090 MHz  
WDW QSI  
SSB 2  
LB 0.00 Hz  
GB 0

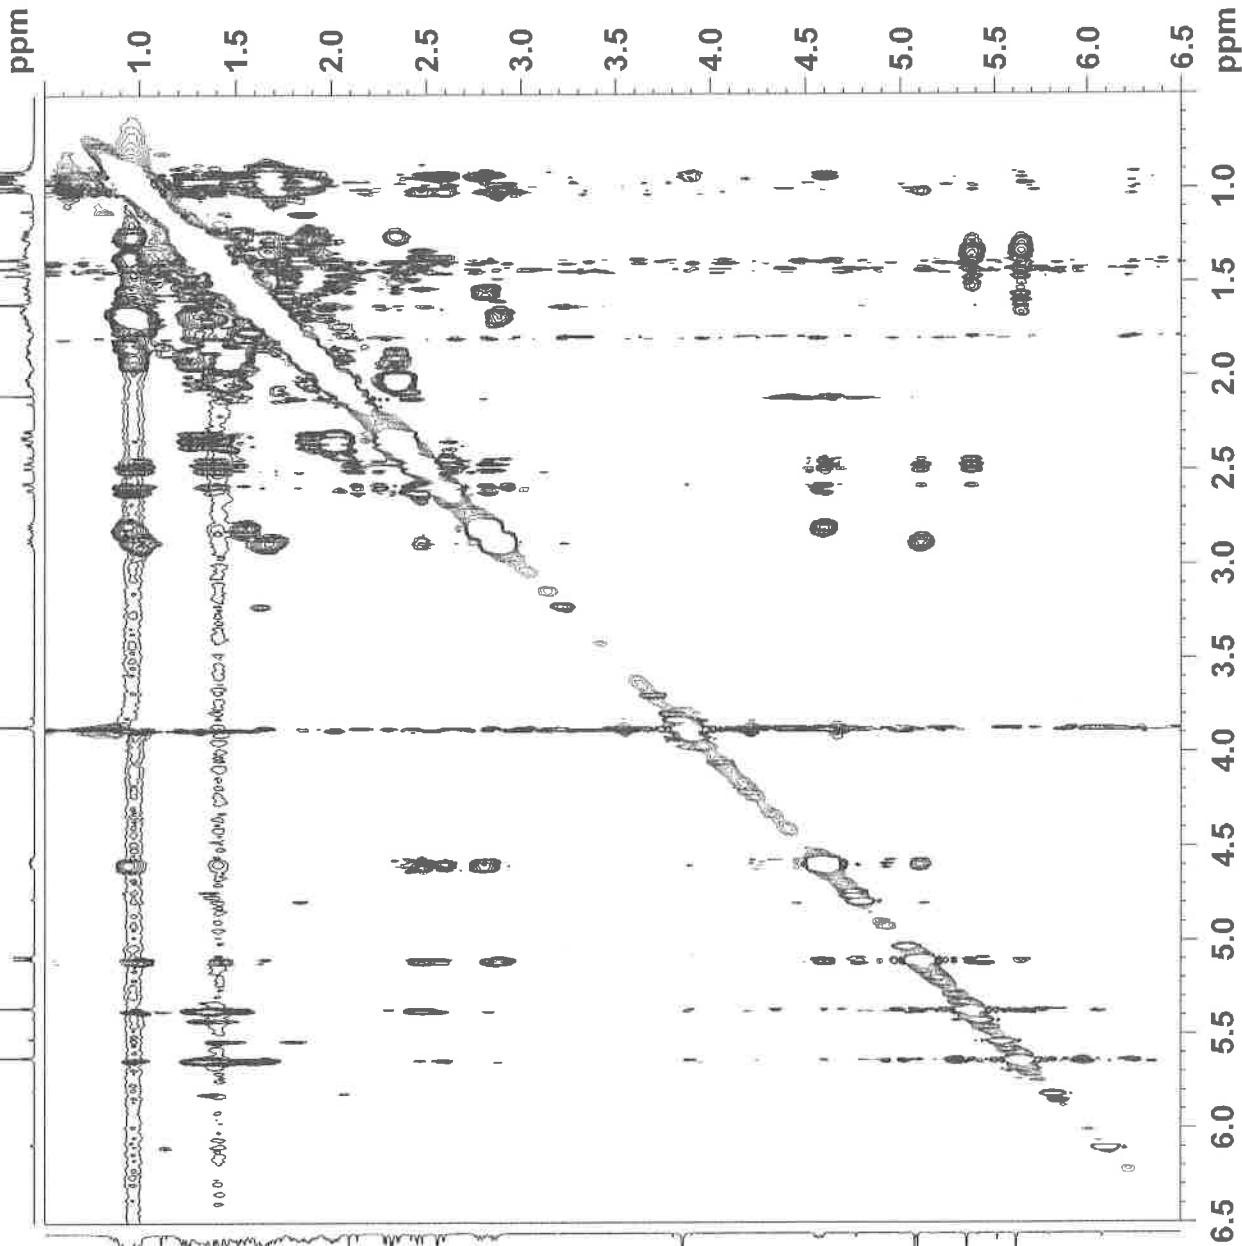

methyloxime E-26

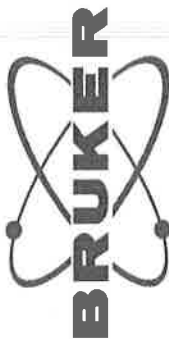

NAME BTM-methyloxime-2

EXPNO 2

PROCNO 1

Date\_ 20130213

Time\_ 7.43

INSTRUM spect

PROBHD 5 mm PABBO BB-

PULPROG noesyph

TD 2048

SOLVENT CDCl3

NS 16

DS 4

SWH 4084.967 Hz

FIDRES 1.994613 Hz

AQ 0.2507252 sec

RG 256

DW 122.400 usec

DE 6.50 usec

TE 298.8 K

D0 0.00010674 sec

D1 1.00000000 sec

D8 0.30000001 sec

INO 0.00024480 sec

===== CHANNEL f1 =====

NUC1 1H

P1 12.30 usec

PL1 -4.00 dB

PL1W 23.34542084 W

SFO1 400.1318419 MHz

ND0 1

TD 256

SFO1 400.1318 MHz

FIDRES 15.956903 Hz

SW 10.209 ppm

FMODE States-TPPI

SI 1024

SF 400.1300000 MHz

WDW QSINE

SSB 2

LB 0.00 Hz

GB 0

PC 1.00

SI 1024

MC2 States-TPPI

SF 400.1300000 MHz

WDW QSINE

SSB 2

LB 0.00 Hz

GB 0

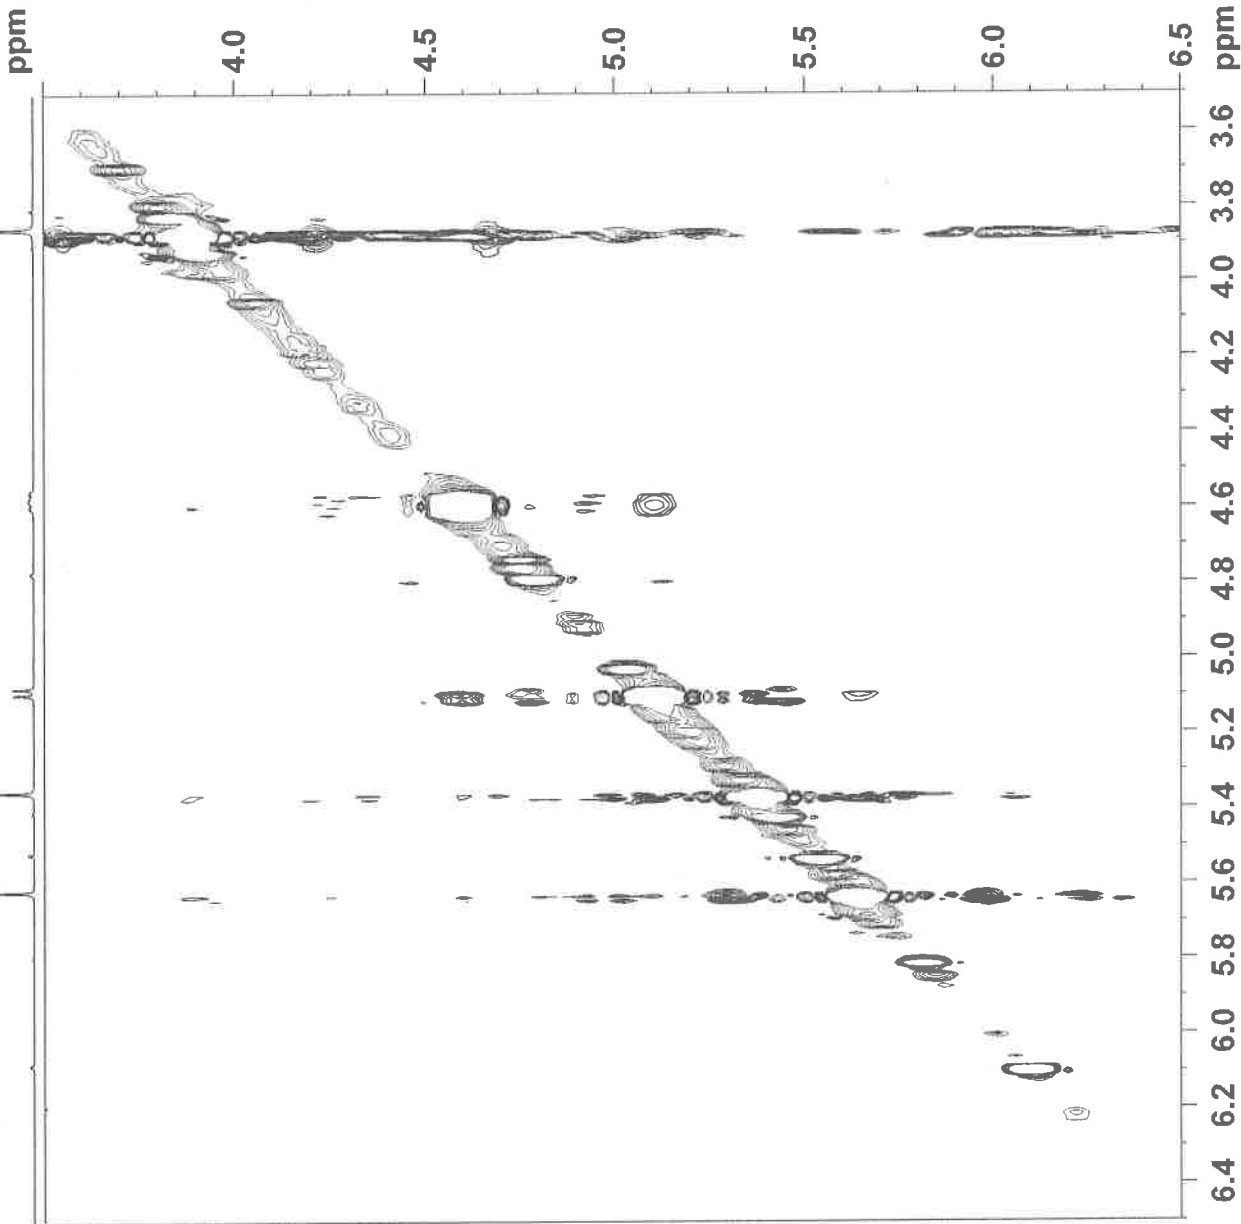

Oxime  
methyl
